# Supplementary material
Source: PubMed Central journal article supplement (PMC4233253)
Supplement: NIHMS60439-supplement-3.pdf [file NIHMS60439-supplement-3.pdf]

Webappendix A

**Table S1 Comparison of characteristics at screening for the 478 who were not randomised and the 1,369 that were randomised**

| <b>Characteristic</b>                                    | <b>1,369 Randomised</b> | <b>478 Not randomised</b> |
|----------------------------------------------------------|-------------------------|---------------------------|
| <b>Median age (IQR), years</b>                           | 34 (29-40)              | 34 (29-39)                |
| <b>Female</b>                                            | 75.1%                   | 71.4%                     |
| <b>On-ART</b>                                            | 65.9%                   | 38.2%                     |
| <b>Median CD4+ count (IQR),<br/>cells/mm<sup>3</sup></b> |                         |                           |
| <b>Overall</b>                                           | 232 (159-382)<br>N=1362 | 198 (141-286)<br>N=470    |
| <b>Start-ART</b>                                         | 171 (127-213)<br>N=464  | 177 (125-210)<br>N=289    |
| <b>On-ART</b>                                            | 303 (199-440)<br>N=898  | 302 (205-421)<br>N=181    |
| <b>Previous TB</b>                                       | 42.2%<br>N=1,367        | 34.5%<br>N=475            |

**Table S2 Reasons for stopping isoniazid or placebo during the active intervention phase, by study arm**

| <b>Outcomes</b>                                         | <b>667 Placebo<sup>1</sup></b> | <b>662 Isoniazid<sup>2</sup></b> | <b>1,329 Total</b> |
|---------------------------------------------------------|--------------------------------|----------------------------------|--------------------|
| <b>Completed study drug phase</b>                       | 550                            | 550                              | 1,100              |
| <b>Raised ALT <math>\geq</math> grade 3<sup>3</sup></b> | 10                             | 19                               | 29                 |
| <b>Clinical Hepatitis</b>                               | 3                              | -                                | 3                  |
| <b>Peripheral neuropathy <math>\geq</math> grade 2</b>  | 1                              | 3                                | 4                  |
| <b>Rash <math>\geq</math> grade 2</b>                   | 4                              | 5                                | 8                  |
| <b>Tuberculosis</b>                                     | 24                             | 10                               | 34                 |
| <b>Hospitalization<sup>4</sup></b>                      | 1                              | 1                                | 2                  |
| <b>Death</b>                                            | 6                              | 5                                | 11                 |
| <b>Participant choice</b>                               | 28                             | 23                               | 51                 |
| <b>Default study drug for <math>\geq</math>3months</b>  | 41                             | 46                               | 87                 |

<sup>1</sup>On ART alone; <sup>2</sup>On ART plus isoniazid; <sup>3</sup>Grade 3 alanine transaminase (ALT) elevation if  $\geq$  5 times upper limit of normal;

<sup>4</sup>Hospitalisation: cerebrovascular accident, acute psychosis.

**Table S3 Effect by time period since randomisation**

|                                       | Placebo |               |                 | INH |               |                 | **HRu | 95% CI      | *P   |
|---------------------------------------|---------|---------------|-----------------|-----|---------------|-----------------|-------|-------------|------|
|                                       | n       | Cases<br>/ PY | Rate/<br>100 PY | n   | Cases<br>/ PY | Rate/<br>100 PY |       |             |      |
| <b>Period since<br/>randomisation</b> |         |               |                 |     |               |                 |       |             |      |
| 0-11 months<br>(active phase)         | 667     | 25/ 634.0     | 3.9             | 662 | 13/636.3      | 2.0             | 0.52  | 0.27 - 1.01 | 0.05 |
| 12-23 months                          | 601     | 21/ 567.4     | 3.7             | 609 | 13/ 580.2     | 2.2             | 0.61  | 0.30 - 1.21 | 0.15 |
| ≥ 24* months                          | 521     | 12/ 395.9     | 3.0             | 539 | 11/ 412.8     | 2.7             | 0.88  | 0.39 - 2.0  | 0.75 |

\*Max time at risk=3.7 years \*\*Hazard ratio unadjusted \*P=Logrank test p-value for equality of survival functions. The likelihood ratio test p-value for interaction was 0.61 and for trend, P=0.34.

**Table S4 Number needed to treat to benefit vs. harm**

| <b>Endpoint</b>                          | <b>Non-cases</b> | <b>Cases</b> | <b>Absolute Risk</b> | <b>Absolute Risk Difference (95% CI)</b> | <b>Number needed to treat</b> |
|------------------------------------------|------------------|--------------|----------------------|------------------------------------------|-------------------------------|
| <b>All tuberculosis</b>                  |                  |              |                      |                                          |                               |
| <b>Placebo</b>                           | 609              | 58           | 0.10                 |                                          |                               |
| <b>Isoniazid</b>                         | 625              | 37           | 0.06                 | 0.04<br>0.03-0.06                        | *25                           |
| <b>§Stopping drug for adverse events</b> |                  |              |                      |                                          |                               |
| <b>Placebo</b>                           | 649              | 18           | 0.03                 |                                          |                               |
| <b>Isoniazid</b>                         | 635              | 27           | 0.04                 | 0.01<br>0.004 - 0.04                     | **100                         |

\*Number needed to treat to benefit one individual and \*\*Number needed to treat to harm one individual:  $[1 / \text{Absolute Risk Difference}]$ .

§Stopping for any of grade 3/4 ALT, clinical hepatitis, new or worsening grade 2 or more rash or peripheral neuropathy

**Table S5 Specific causes of death by study arm**

| <b>Cause</b>                                              | <b>Placebo</b> | <b>Isoniazid</b> | <b>Total</b> |
|-----------------------------------------------------------|----------------|------------------|--------------|
| <b>Tuberculosis</b>                                       | <b>6</b>       | <b>2</b>         | <b>8</b>     |
| <b>Non Tuberculosis</b>                                   | <b>7</b>       | <b>6</b>         | <b>13</b>    |
| Epileptic seizure                                         | -              | 1                |              |
| Renal failure                                             | -              | 2                |              |
| Road traffic accident                                     | 1              | 1                |              |
| Suicide                                                   | -              | 1                |              |
| Complications following<br>nosocomial infection           | -              | 1                |              |
| Complications following<br>gastric cancer                 | 1              | -                |              |
| Cerebro vascular accident                                 | 1              | -                |              |
| Complications following<br>emergency caesarean<br>section | 1              | -                |              |
| Gun shot to the head                                      | 1              | -                |              |
| Bacterial meningitis                                      | 1              | -                |              |
| Upper GI bleed                                            | 1              | -                |              |
| <b>Unknown</b>                                            | <b>8</b>       | <b>8</b>         | <b>16</b>    |
| <b>Total</b>                                              | <b>21</b>      | <b>16</b>        | <b>37</b>    |

### Tests of tuberculosis infection

Tuberculin skin tests (TST; 2TU RT23 PPD, Statens Serum Institut, Denmark) and interferon gamma release assays (IGRA; QuantiFERON Gold In-Tube, Cellestis, Australia) were performed as part of a nested study. (13) TST and IGRA were performed at the baseline screening visit, prior to application of RCT-specific inclusion/exclusion criteria, in persons who indicated willingness to return for TST results. Manufacturer's criteria for IGRA positivity were used ( $\geq 0.35$  IU/ml); TST induration of  $\geq 5$  mm was deemed positive. 77% (1,027) of the cohort at analysis had TST and IGRA tests performed. 998 of 1,027 had IGRA results available, 93% of those had valid results. 944 of 1,027 had TST results available. Those who did not accept TST/IGRA testing did not differ from those who did with respect to age, gender, CD4+ count, previous history or ART status (see table below).

**Table S6 Summary of enrolment characteristics of those who did not accept TST/IGRA and those who did**

| Characteristic                                 | 302 Not accepted | 1027 Accepted |
|------------------------------------------------|------------------|---------------|
| Median age (IQR), years                        | 34 (30-41)       | 34(29-39)     |
| Female                                         | 68.9% (208)      | 76.9% (790)   |
| Established on ART                             | 73.5% (222)      | 71.1% (730)   |
| Median CD4+ count (IQR), cells/mm <sup>3</sup> | 225 (159-396)    | 214 (150-350) |
|                                                | N=269            | N=918         |
| Previous TB                                    | 43.4% (129)      | 42.6% (431)   |
|                                                | N=297            | N=1,012       |

**Figure S1a. Frequency histogram of study drug duration for those registered as completed the active phase (N=1,100)**

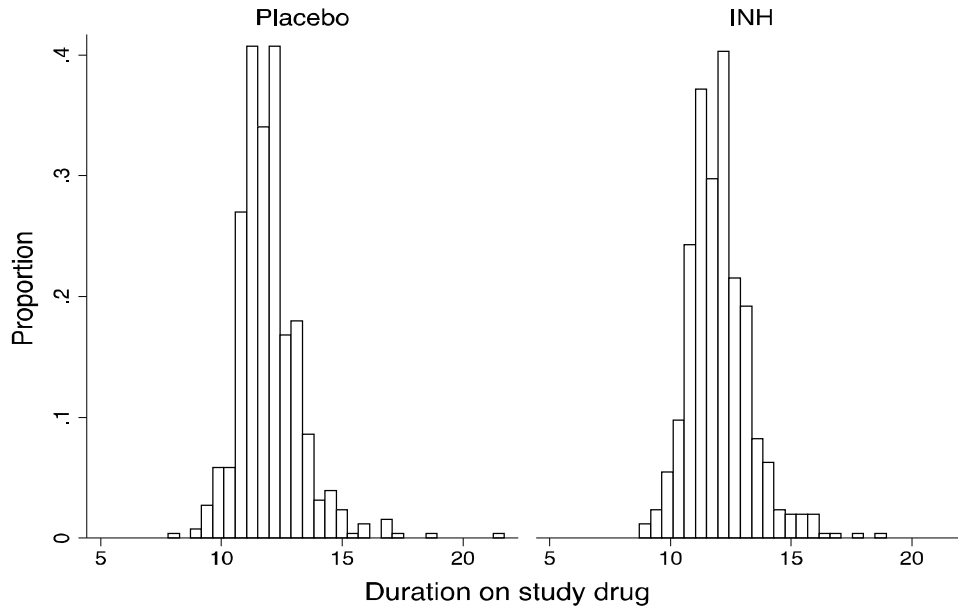

Placebo: range 8-22months; median 12 (IQR: 11-13)

INH: range 9-19 months; median 12 (IQR: 11-13)

**Figure S1b. Actual number of doses prescribed, for those registered as completed the active phase (N=1,100)**

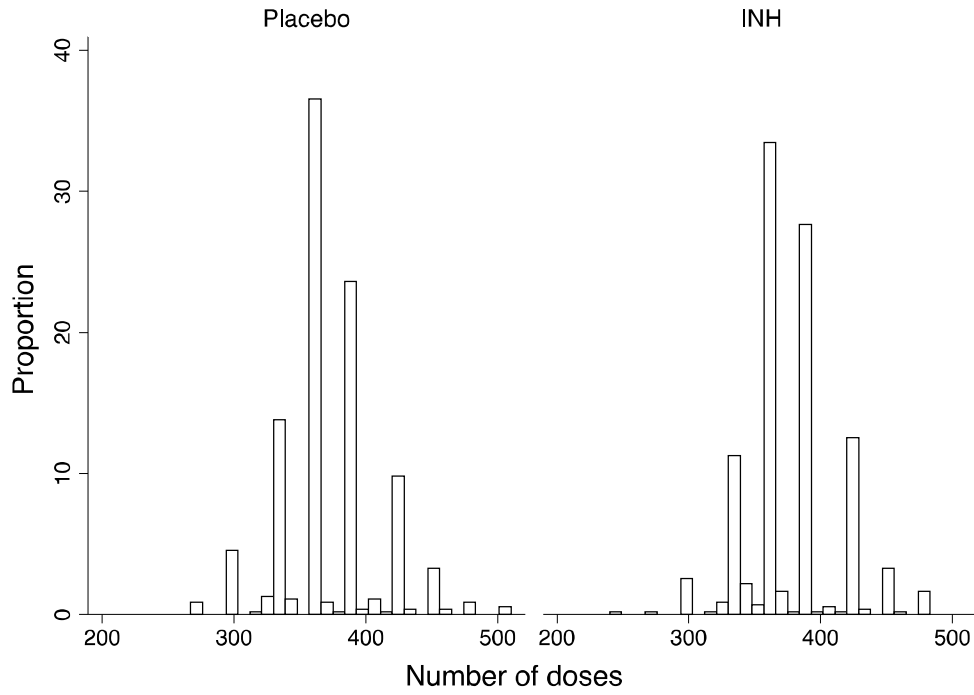

Placebo: range 268-510 doses; median 360 doses (IQR: 360-390)

INH: range 240-480 doses; median 360 doses (IQR: 360-390)



### Tests of tuberculosis infection

Tuberculin skin tests (TST; 2TU RT23 PPD, Statens Serum Institut, Denmark) and interferon gamma release assays (IGRA; QuantiFERON Gold In-Tube, Cellestis, Australia) were performed as part of a nested study.(13) TST and IGRA were performed at the baseline screening visit, prior to application of RCT-specific inclusion/exclusion criteria, in persons who indicated willingness to return for TST results. Manufacturer's criteria for IGRA positivity were used ( $\geq 0.35$  IU/ml); TST induration of  $\geq 5$  mm was deemed positive. 77% (1,027) of the cohort at analysis had TST and IGRA tests performed. 998 of 1,027 had IGRA results available, 93% of those had valid results. 944 of 1,027 had TST results available. Those who did not accept TST/IGRA testing did not differ from those who did with respect to age, gender, CD4+ count, previous history or ART status (see table below).

**Table S4 Summary of enrolment characteristics of those who did not accept TST/IGRA and those who did**

| Characteristic                                 | 302 Not accepted | 1027 Accepted |
|------------------------------------------------|------------------|---------------|
| Median age (IQR), years                        | 34 (30-41)       | 34(29-39)     |
| Female                                         | 68.9% (208)      | 76.9% (790)   |
| Established on ART                             | 73.5% (222)      | 71.1% (730)   |
| Median CD4+ count (IQR), cells/mm <sup>3</sup> | 225 (159-396)    | 214 (150-350) |
|                                                | N=269            | N=918         |
| Previous TB                                    | 43.4% (129)      | 42.6% (431)   |
|                                                | N=297            | N=1,012       |

**Table S5 Comparison of characteristics at screening for the 478 who were not randomized and the 1,369 that were randomized**

| <b>Characteristic</b>                                    | <b>1,369</b>            | <b>478</b>             |
|----------------------------------------------------------|-------------------------|------------------------|
| <b>Median age (IQR), years</b>                           | 34 (29-40)              | 34 (29-39)             |
| <b>Female</b>                                            | 75.1%                   | 71.4%                  |
| <b>Established on ART</b>                                | 65.9%                   | 38.2%                  |
| <b>Median CD4+ count (IQR),<br/>cells/mm<sup>3</sup></b> | 232 (159-382)<br>N=1362 | 198 (141-286)<br>N=470 |
| <b>Previous TB</b>                                       | 42.2%<br>N=1,367        | 34.5%<br>N=475         |
